# Supplementary material
Source: ML conference proceedings conference paper supplement (https://proceedings.neurips.cc/paper_files/paper/2022/hash/828c6d69bdf91fca7f2b97c4dc214e94-Abstract.html)
Supplement: Supplementary file 1 [file 828c6d69bdf91fca7f2b97c4dc214e94-Supplemental-Conference.zip]

Archive with 3 entries (3 files):
- appendix.pdf
- images.zip
- video.zip
